# Supplementary figures and images for: Syntheses, crystal structures and thermoelectric properties of two new thallium tellurides: Tl4ZrTe4 and Tl4HfTe4
Source: Royal Society of Chemistry journal article supplement (doi:10.1039/c0jm01363c), 2010-01-01

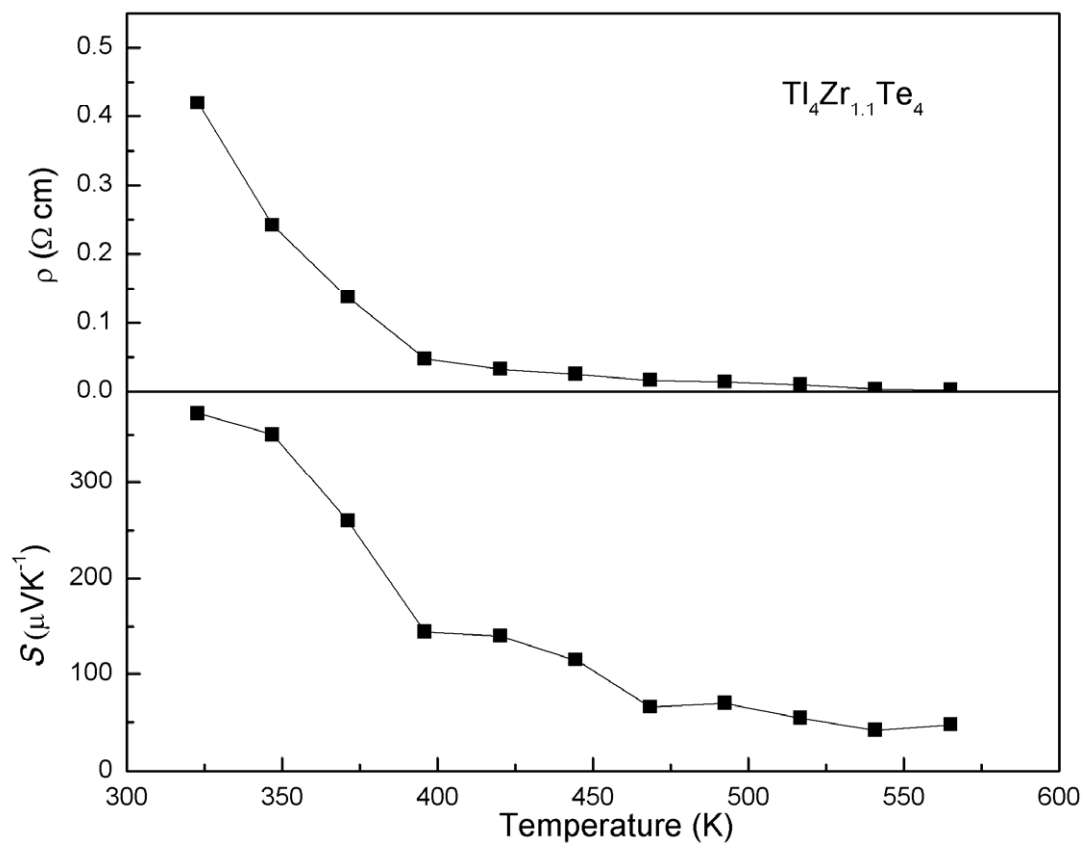

Supplement: c0jm01363c.pdf [file c0jm01363c.pdf]
